# Supplementary material for: Theoretical study on the stability of double-decker type metal phthalocyanines, M(Pc)2 and M(Pc)2+ (M = Ti, Sn and Sc): a critical assessment on the performance of density functionals
Source: Royal Society of Chemistry journal article supplement (doi:10.1039/c4cp05645k), 2015-01-01
Supplement: c4cp05645k1.pdf [file c4cp05645k1.pdf]

*Electronic supplementary information (ESI)*

# Theoretical study on the stability of double-decker type metal phthalocyanines, $M(\text{Pc})_2$ and $M(\text{Pc})_2^+$ ( $M = \text{Ti}, \text{Sn}$ and $\text{Sc}$ ): critical assessment on the performance of density functional

*Michinori Sumimoto,<sup>\*a</sup> Yukio Kawashima,<sup>b</sup> Kenji Hori<sup>a</sup> and Hitoshi Fujimoto<sup>\*c</sup>*

*<sup>a</sup>Graduate School of Science and Engineering, Yamaguchi University, Tokiwadai, Ube 755-8611, Japan, <sup>b</sup>RIKEN Advanced Institute for Computational Science, 7-1-26, Minatojima-minami-machi, Chuo-ku, Kobe, Hyogo 650-0047, Japan, <sup>c</sup>Department of Chemistry, Faculty of Science, Kumamoto University, Kurokami 2-39-1, Kumamoto 860-8555, Japan.*

*Cartesian coordinates for  $M(\text{Pc})_2$  and  $M(\text{Pc})_2^+$  with the PBE1PBE functional*

|                                                                  |    |
|------------------------------------------------------------------|----|
| Ti(Pc) <sub>2</sub> under D <sub>2</sub> symmetry                | 2  |
| Ti(Pc) <sub>2</sub> under D <sub>4d</sub> symmetry               | 3  |
| Ti(Pc) <sub>2</sub> <sup>+</sup> under D <sub>2</sub> symmetry   | 4  |
| Ti(Pc) <sub>2</sub> <sup>+</sup> under D <sub>4d</sub> symmetry  | 5  |
| Sn(Pc) <sub>2</sub> under D <sub>2</sub> symmetry                | 6  |
| Sn(Pc) <sub>2</sub> under D <sub>4d</sub> symmetry               | 7  |
| Sn(Pc) <sub>2</sub> <sup>+</sup> under D <sub>2</sub> symmetry   | 8  |
| Sn (Pc) <sub>2</sub> <sup>+</sup> under D <sub>4d</sub> symmetry | 9  |
| Sc(Pc) <sub>2</sub> under D <sub>2</sub> symmetry                | 10 |
| Sc(Pc) <sub>2</sub> under D <sub>4d</sub> symmetry               | 11 |
| Sc(Pc) <sub>2</sub> <sup>+</sup> under D <sub>2</sub> symmetry   | 12 |
| Sc(Pc) <sub>2</sub> <sup>+</sup> under D <sub>4d</sub> symmetry  | 13 |

## Ti(Pc)<sub>2</sub> D<sub>2</sub> symmetry

|    |             |             |            |   |             |             |             |
|----|-------------|-------------|------------|---|-------------|-------------|-------------|
| Ti | 0.00000000  | 0.00000000  | 0.00000000 | H | -6.17412900 | 3.72176300  | 2.98263700  |
| N  | 0.73519300  | 1.69702400  | 1.29810100 | H | -7.24621500 | 1.61386000  | 2.30038100  |
| N  | -0.73519300 | -1.69702400 | 1.29810100 | N | -0.73519300 | 1.69702400  | -1.29810100 |
| N  | 1.75651900  | -0.76234200 | 1.03382100 | N | 0.73519300  | -1.69702400 | -1.29810100 |
| N  | -1.75651900 | 0.76234200  | 1.03382100 | N | -1.75651900 | -0.76234200 | -1.03382100 |
| N  | 3.13025900  | 1.25801900  | 1.33475900 | N | 1.75651900  | 0.76234200  | -1.03382100 |
| N  | -3.13025900 | -1.25801900 | 1.33475900 | N | -3.13025900 | 1.25801900  | -1.33475900 |
| N  | 1.24081800  | -2.96355000 | 1.82474400 | N | 3.13025900  | -1.25801900 | -1.33475900 |
| N  | -1.24081800 | 2.96355000  | 1.82474400 | N | -1.24081800 | -2.96355000 | -1.82474400 |
| C  | 2.09898200  | 1.97056500  | 1.53715800 | N | 1.24081800  | 2.96355000  | -1.82474400 |
| C  | 0.05195800  | 2.77255100  | 1.74597400 | C | -2.09898200 | 1.97056500  | -1.53715800 |
| C  | 2.05220700  | -1.94869900 | 1.53351100 | C | -0.05195800 | 2.77255100  | -1.74597400 |
| C  | 3.01937400  | -0.04506600 | 0.78891200 | C | -2.05220700 | -1.94869900 | -1.53351100 |
| C  | -2.09898200 | -1.97056500 | 1.53715800 | C | -3.01937400 | -0.04506600 | -0.78891200 |
| C  | -0.05195800 | -2.77255100 | 1.74597400 | C | 2.09898200  | -1.97056500 | -1.53715800 |
| C  | -2.05220700 | 1.94869900  | 1.53351100 | C | 0.05195800  | -2.77255100 | -1.74597400 |
| C  | -3.01937400 | 0.04506600  | 0.78891200 | C | 2.05220700  | 1.94869900  | -1.53351100 |
| C  | 2.23579000  | 3.31796700  | 2.11634200 | C | 3.01937400  | 0.04506600  | -0.78891200 |
| C  | 0.95558500  | 3.82028400  | 2.23802300 | C | -2.23579000 | 3.31796700  | -2.11634200 |
| C  | 3.48682500  | -2.09486700 | 1.77965200 | C | -0.95558500 | 3.82028400  | -2.23802300 |
| C  | 4.09287400  | -0.92821500 | 1.35569000 | C | -3.48682500 | -2.09486700 | -1.77965200 |
| C  | -2.23579000 | -3.31796700 | 2.11634200 | C | -4.09287400 | -0.92821500 | -1.35569000 |
| C  | -0.95558500 | -3.82028400 | 2.23802300 | C | 2.23579000  | -3.31796700 | -2.11634200 |
| C  | -3.48682500 | 2.09486700  | 1.77965200 | C | 0.95558500  | -3.82028400 | -2.23802300 |
| C  | -4.09287400 | 0.92821500  | 1.35569000 | C | 3.48682500  | 2.09486700  | -1.77965200 |
| C  | 3.34266000  | 4.04744000  | 2.51297300 | C | 4.09287400  | 0.92821500  | -1.35569000 |
| C  | 0.70943900  | 5.07784100  | 2.76354700 | C | -3.34266000 | 4.04744000  | -2.51297300 |
| C  | 3.11154400  | 5.31834700  | 3.03340500 | C | -0.70943900 | 5.07784100  | -2.76354700 |
| C  | 1.81483500  | 5.82688500  | 3.15639600 | C | -3.11154400 | 5.31834700  | -3.03340500 |
| C  | 4.20534100  | -3.12837000 | 2.36420200 | C | -1.81483500 | 5.82688500  | -3.15639600 |
| C  | 5.44630600  | -0.71588800 | 1.55135400 | C | -4.20534100 | -3.12837000 | -2.36420200 |
| C  | 5.57211600  | -2.94121100 | 2.52754400 | C | -5.44630600 | -0.71588800 | -1.55135400 |
| C  | 6.18073200  | -1.74537400 | 2.13555200 | C | -5.57211600 | -2.94121100 | -2.52754400 |
| C  | -3.34266000 | -4.04744000 | 2.51297300 | C | -6.18073200 | -1.74537400 | -2.13555200 |
| C  | -0.70943900 | -5.07784100 | 2.76354700 | C | 3.34266000  | -4.04744000 | -2.51297300 |
| C  | -3.11154400 | -5.31834700 | 3.03340500 | C | 0.70943900  | -5.07784100 | -2.76354700 |
| C  | -1.81483500 | -5.82688500 | 3.15639600 | C | 3.11154400  | -5.31834700 | -3.03340500 |
| C  | -4.20534100 | 3.12837000  | 2.36420200 | C | 1.81483500  | -5.82688500 | -3.15639600 |
| C  | -5.44630600 | 0.71588800  | 1.55135400 | C | 4.20534100  | 3.12837000  | -2.36420200 |
| C  | -5.57211600 | 2.94121100  | 2.52754400 | C | 5.44630600  | 0.71588800  | -1.55135400 |
| C  | -6.18073200 | 1.74537400  | 2.13555200 | C | 5.57211600  | 2.94121100  | -2.52754400 |
| H  | 4.34276400  | 3.63911000  | 2.41591100 | C | 6.18073200  | 1.74537400  | -2.13555200 |
| H  | -0.30366400 | 5.45322500  | 2.85730800 | H | -4.34276400 | 3.63911000  | -2.41591100 |
| H  | 3.95201000  | 5.92805000  | 3.35139500 | H | 0.30366400  | 5.45322500  | -2.85730800 |
| H  | 1.67166000  | 6.82145800  | 3.56789200 | H | -3.95201000 | 5.92805000  | -3.35139500 |
| H  | 3.70386000  | -4.03401800 | 2.68731200 | H | -1.67166000 | 6.82145800  | -3.56789200 |
| H  | 5.91261400  | 0.22306400  | 1.27456700 | H | -3.70386000 | -4.03401800 | -2.68731200 |
| H  | 6.17412900  | -3.72176300 | 2.98263700 | H | -5.91261400 | 0.22306400  | -1.27456700 |
| H  | 7.24621500  | -1.61386000 | 2.30038100 | H | -6.17412900 | -3.72176300 | -2.98263700 |
| H  | -4.34276400 | -3.63911000 | 2.41591100 | H | -7.24621500 | -1.61386000 | -2.30038100 |
| H  | 0.30366400  | -5.45322500 | 2.85730800 | H | 4.34276400  | -3.63911000 | -2.41591100 |
| H  | -3.95201000 | -5.92805000 | 3.35139500 | H | -0.30366400 | -5.45322500 | -2.85730800 |
| H  | -1.67166000 | -6.82145800 | 3.56789200 | H | 3.95201000  | -5.92805000 | -3.35139500 |
| H  | -3.70386000 | 4.03401800  | 2.68731200 | H | 1.67166000  | -6.82145800 | -3.56789200 |
| H  | -5.91261400 | -0.22306400 | 1.27456700 | H | 3.70386000  | 4.03401800  | -2.68731200 |
|    |             |             |            | H | 5.91261400  | -0.22306400 | -1.27456700 |
|    |             |             |            | H | 6.17412900  | 3.72176300  | -2.98263700 |
|    |             |             |            | H | 7.24621500  | 1.61386000  | -2.30038100 |

## Ti(Pc)<sub>2</sub> D<sub>4d</sub> symmetry

|    |             |             |            |   |             |             |             |
|----|-------------|-------------|------------|---|-------------|-------------|-------------|
| Ti | 0.00000000  | 0.00000000  | 0.00000000 | H | -7.27008000 | 1.23036100  | 2.63202200  |
| N  | 0.00000000  | 1.91849600  | 1.20048900 | H | -7.27008000 | -1.23036100 | 2.63202200  |
| N  | 0.00000000  | -1.91849600 | 1.20048900 | N | -1.35658200 | 1.35658200  | -1.20048900 |
| N  | 1.91849600  | 0.00000000  | 1.20048900 | N | 1.35658200  | -1.35658200 | -1.20048900 |
| N  | -1.91849600 | 0.00000000  | 1.20048900 | N | -1.35658200 | -1.35658200 | -1.20048900 |
| N  | 2.35426500  | 2.35426500  | 1.52051900 | N | 1.35658200  | 1.35658200  | -1.20048900 |
| N  | -2.35426500 | -2.35426500 | 1.52051900 | N | -3.32943300 | 0.00000000  | -1.52051900 |
| N  | 2.35426500  | -2.35426500 | 1.52051900 | N | 3.32943300  | 0.00000000  | -1.52051900 |
| N  | -2.35426500 | 2.35426500  | 1.52051900 | N | 0.00000000  | -3.32943300 | -1.52051900 |
| C  | 1.09384600  | 2.70824600  | 1.45893800 | N | 0.00000000  | 3.32943300  | -1.52051900 |
| C  | -1.09384600 | 2.70824600  | 1.45893800 | C | -2.68848500 | 1.14155300  | -1.45893800 |
| C  | 2.70824600  | -1.09384600 | 1.45893800 | C | -1.14155300 | 2.68848500  | -1.45893800 |
| C  | 2.70824600  | 1.09384600  | 1.45893800 | C | -1.14155300 | -2.68848500 | -1.45893800 |
| C  | -1.09384600 | -2.70824600 | 1.45893800 | C | -2.68848500 | -1.14155300 | -1.45893800 |
| C  | 1.09384600  | -2.70824600 | 1.45893800 | C | 2.68848500  | -1.14155300 | -1.45893800 |
| C  | -2.70824600 | 1.09384600  | 1.45893800 | C | 1.14155300  | -2.68848500 | -1.45893800 |
| C  | -2.70824600 | -1.09384600 | 1.45893800 | C | 1.14155300  | 2.68848500  | -1.45893800 |
| C  | 0.69528700  | 4.06076100  | 1.78320300 | C | 2.68848500  | 1.14155300  | -1.45893800 |
| C  | -0.69528700 | 4.06076100  | 1.78320300 | C | -3.36303400 | 2.37974900  | -1.78320300 |
| C  | 4.06076100  | -0.69528700 | 1.78320300 | C | -2.37974900 | 3.36303400  | -1.78320300 |
| C  | 4.06076100  | 0.69528700  | 1.78320300 | C | -2.37974900 | -3.36303400 | -1.78320300 |
| C  | -0.69528700 | -4.06076100 | 1.78320300 | C | -3.36303400 | -2.37974900 | -1.78320300 |
| C  | 0.69528700  | -4.06076100 | 1.78320300 | C | 3.36303400  | -2.37974900 | -1.78320300 |
| C  | -4.06076100 | 0.69528700  | 1.78320300 | C | 2.37974900  | -3.36303400 | -1.78320300 |
| C  | -4.06076100 | -0.69528700 | 1.78320300 | C | 2.37974900  | 3.36303400  | -1.78320300 |
| C  | 1.42251600  | 5.20398700  | 2.09827300 | C | 3.36303400  | 2.37974900  | -1.78320300 |
| C  | -1.42251600 | 5.20398700  | 2.09827300 | C | -4.68564500 | 2.67390400  | -2.09827300 |
| C  | 0.70254300  | 6.35188700  | 2.39225600 | C | -2.67390400 | 4.68564500  | -2.09827300 |
| C  | -0.70254300 | 6.35188700  | 2.39225600 | C | -4.98823600 | 3.99469000  | -2.39225600 |
| C  | 5.20398700  | -1.42251600 | 2.09827300 | C | -3.99469000 | 4.98823600  | -2.39225600 |
| C  | 5.20398700  | 1.42251600  | 2.09827300 | C | -2.67390400 | -4.68564500 | -2.09827300 |
| C  | 6.35188700  | -0.70254300 | 2.39225600 | C | -4.68564500 | -2.67390400 | -2.09827300 |
| C  | 6.35188700  | 0.70254300  | 2.39225600 | C | -3.99469000 | -4.98823600 | -2.39225600 |
| C  | -1.42251600 | -5.20398700 | 2.09827300 | C | -4.98823600 | -3.99469000 | -2.39225600 |
| C  | 1.42251600  | -5.20398700 | 2.09827300 | C | 4.68564500  | -2.67390400 | -2.09827300 |
| C  | -0.70254300 | -6.35188700 | 2.39225600 | C | 2.67390400  | -4.68564500 | -2.09827300 |
| C  | 0.70254300  | -6.35188700 | 2.39225600 | C | 4.98823600  | -3.99469000 | -2.39225600 |
| C  | -5.20398700 | 1.42251600  | 2.09827300 | C | 3.99469000  | 4.98823600  | -2.39225600 |
| C  | -5.20398700 | -1.42251600 | 2.09827300 | H | -5.44173500 | 1.89641800  | -2.10538000 |
| C  | -6.35188700 | 0.70254300  | 2.39225600 | H | -1.89641800 | 5.44173500  | -2.10538000 |
| C  | -6.35188700 | -0.70254300 | 2.39225600 | H | -6.01072000 | 4.27072600  | -2.63202200 |
| H  | 2.50691700  | 5.18885800  | 2.10538000 | H | -4.27072600 | 6.01072000  | -2.63202200 |
| H  | -2.50691700 | 5.18885800  | 2.10538000 | H | -1.89641800 | -5.44173500 | -2.10538000 |
| H  | 1.23036100  | 7.27008000  | 2.63202200 | H | -5.44173500 | -1.89641800 | -2.10538000 |
| H  | -1.23036100 | 7.27008000  | 2.63202200 | H | -4.27072600 | -6.01072000 | -2.63202200 |
| H  | 5.18885800  | -2.50691700 | 2.10538000 | H | -6.01072000 | -4.27072600 | -2.63202200 |
| H  | 5.18885800  | 2.50691700  | 2.10538000 | H | 5.44173500  | -1.89641800 | -2.10538000 |
| H  | 7.27008000  | -1.23036100 | 2.63202200 | H | 1.89641800  | -5.44173500 | -2.10538000 |
| H  | 7.27008000  | 1.23036100  | 2.63202200 | H | 6.01072000  | -4.27072600 | -2.63202200 |
| H  | -2.50691700 | -5.18885800 | 2.10538000 | H | 4.27072600  | -6.01072000 | -2.63202200 |
| H  | 2.50691700  | -5.18885800 | 2.10538000 | H | 1.89641800  | 5.44173500  | -2.10538000 |
| H  | -1.23036100 | -7.27008000 | 2.63202200 | H | 5.44173500  | 1.89641800  | -2.10538000 |
| H  | 1.23036100  | -7.27008000 | 2.63202200 | H | 4.27072600  | 6.01072000  | -2.63202200 |
| H  | -5.18885800 | 2.50691700  | 2.10538000 | H | 6.01072000  | 4.27072600  | -2.63202200 |
| H  | -5.18885800 | -2.50691700 | 2.10538000 |   |             |             |             |

## Ti(Pc)<sub>2</sub><sup>+</sup> D<sub>2</sub> symmetry

|    |             |             |            |   |             |             |             |
|----|-------------|-------------|------------|---|-------------|-------------|-------------|
| Ti | 0.00000000  | 0.00000000  | 0.00000000 | H | -6.20599000 | 3.68202500  | 2.94816200  |
| N  | 0.73396900  | 1.71789900  | 1.26147300 | H | -7.24876300 | 1.55161300  | 2.30062200  |
| N  | -0.73396900 | -1.71789900 | 1.26147300 | N | -0.73396900 | 1.71789900  | -1.26147300 |
| N  | 1.75238900  | -0.73065100 | 1.06319400 | N | 0.73396900  | -1.71789900 | -1.26147300 |
| N  | -1.75238900 | 0.73065100  | 1.06319400 | N | -1.75238900 | -0.73065100 | -1.06319400 |
| N  | 3.11960700  | 1.29789100  | 1.28531000 | N | 1.75238900  | 0.73065100  | -1.06319400 |
| N  | -3.11960700 | -1.29789100 | 1.28531000 | N | -3.11960700 | 1.29789100  | -1.28531000 |
| N  | 1.25633700  | -2.95588500 | 1.79999600 | N | 3.11960700  | -1.29789100 | -1.28531000 |
| N  | -1.25633700 | 2.95588500  | 1.79999600 | N | -1.25633700 | -2.95588500 | -1.79999600 |
| C  | 2.08745600  | 2.02470300  | 1.47462500 | N | 1.25633700  | 2.95588500  | -1.79999600 |
| C  | 0.03862100  | 2.80053600  | 1.69982500 | C | -2.08745600 | 2.02470300  | -1.47462500 |
| C  | 2.06494200  | -1.93497500 | 1.53647300 | C | -0.03862100 | 2.80053600  | -1.69982500 |
| C  | 2.99801400  | -0.01804100 | 0.84420100 | C | -2.06494200 | -1.93497500 | -1.53647300 |
| C  | -2.08745600 | -2.02470300 | 1.47462500 | C | -2.99801400 | -0.01804100 | -0.84420100 |
| C  | -0.03862100 | -2.80053600 | 1.69982500 | C | 2.08745600  | -2.02470300 | -1.47462500 |
| C  | -2.06494200 | 1.93497500  | 1.53647300 | C | 0.03862100  | -2.80053600 | -1.69982500 |
| C  | -2.99801400 | 0.01804100  | 0.84420100 | C | 2.06494200  | 1.93497500  | -1.53647300 |
| C  | 2.21807400  | 3.38741100  | 2.00626300 | C | 2.99801400  | 0.01804100  | -0.84420100 |
| C  | 0.93041700  | 3.87162900  | 2.14570600 | C | -2.21807400 | 3.38741100  | -2.00626300 |
| C  | 3.49535100  | -2.07204800 | 1.78074800 | C | -0.93041700 | 3.87162900  | -2.14570600 |
| C  | 4.08789300  | -0.88805100 | 1.38164900 | C | -3.49535100 | -2.07204800 | -1.78074800 |
| C  | -2.21807400 | -3.38741100 | 2.00626300 | C | 4.08789300  | 0.88805100  | -1.38164900 |
| C  | -0.93041700 | -3.87162900 | 2.14570600 | C | -2.21807400 | -3.38741100 | -2.00626300 |
| C  | -3.49535100 | 2.07204800  | 1.78074800 | C | 0.93041700  | -3.87162900 | -2.14570600 |
| C  | -4.08789300 | 0.88805100  | 1.38164900 | C | 3.49535100  | 2.07204800  | -1.78074800 |
| C  | 3.32151400  | 4.14196000  | 2.36264100 | C | 4.08789300  | 0.88805100  | -1.38164900 |
| C  | 0.67382400  | 5.13664600  | 2.64830200 | C | -2.21807400 | -3.38741100 | -2.00626300 |
| C  | 3.07811900  | 5.42122200  | 2.85790600 | C | -0.93041700 | -3.87162900 | -2.14570600 |
| C  | 1.77630800  | 5.91121200  | 2.99819300 | C | -3.49535100 | -2.07204800 | -1.78074800 |
| C  | 4.22833900  | -3.10738800 | 2.34569200 | C | 4.08789300  | 0.88805100  | -1.38164900 |
| C  | 5.43813500  | -0.65892300 | 1.57372000 | C | -2.21807400 | -3.38741100 | -2.00626300 |
| C  | 5.59233400  | -2.90277200 | 2.50818200 | C | -0.93041700 | -3.87162900 | -2.14570600 |
| C  | 6.18499300  | -1.69201700 | 2.13605500 | C | 3.49535100  | 2.07204800  | -1.78074800 |
| C  | -3.32151400 | -4.14196000 | 2.36264100 | C | 4.08789300  | 0.88805100  | -1.38164900 |
| C  | -0.67382400 | -5.13664600 | 2.64830200 | C | -2.21807400 | -3.38741100 | -2.00626300 |
| C  | -3.07811900 | -5.42122200 | 2.85790600 | C | -0.93041700 | -3.87162900 | -2.14570600 |
| C  | -1.77630800 | -5.91121200 | 2.99819300 | C | -3.49535100 | -2.07204800 | -1.78074800 |
| C  | -4.22833900 | 3.10738800  | 2.34569200 | C | 4.08789300  | 0.88805100  | -1.38164900 |
| C  | -5.43813500 | 0.65892300  | 1.57372000 | C | -2.21807400 | -3.38741100 | -2.00626300 |
| C  | -5.59233400 | 2.90277200  | 2.50818200 | C | -0.93041700 | -3.87162900 | -2.14570600 |
| C  | -6.18499300 | 1.69201700  | 2.13605500 | C | 3.49535100  | 2.07204800  | -1.78074800 |
| H  | 4.32743900  | 3.75091100  | 2.25825700 | C | 4.08789300  | 0.88805100  | -1.38164900 |
| H  | -0.34139600 | 5.50060800  | 2.75965000 | C | -2.21807400 | -3.38741100 | -2.00626300 |
| H  | 3.91397400  | 6.05138400  | 3.14451400 | C | -0.93041700 | -3.87162900 | -2.14570600 |
| H  | 1.62621900  | 6.91150800  | 3.39124600 | C | 3.49535100  | 2.07204800  | -1.78074800 |
| H  | 3.74345100  | -4.02567400 | 2.65740400 | C | 4.08789300  | 0.88805100  | -1.38164900 |
| H  | 5.89313200  | 0.28927800  | 1.31112400 | C | -2.21807400 | -3.38741100 | -2.00626300 |
| H  | 6.20599000  | -3.68202500 | 2.94816200 | C | -0.93041700 | -3.87162900 | -2.14570600 |
| H  | 7.24876300  | -1.55161300 | 2.30062200 | C | 3.49535100  | 2.07204800  | -1.78074800 |
| H  | -4.32743900 | -3.75091100 | 2.25825700 | C | 4.08789300  | 0.88805100  | -1.38164900 |
| H  | 0.34139600  | -5.50060800 | 2.75965000 | C | -2.21807400 | -3.38741100 | -2.00626300 |
| H  | -3.91397400 | -6.05138400 | 3.14451400 | C | -0.93041700 | -3.87162900 | -2.14570600 |
| H  | -1.62621900 | -6.91150800 | 3.39124600 | C | 3.49535100  | 2.07204800  | -1.78074800 |
| H  | -3.74345100 | 4.02567400  | 2.65740400 | C | 4.08789300  | 0.88805100  | -1.38164900 |
| H  | -5.89313200 | -0.28927800 | 1.31112400 | C | -2.21807400 | -3.38741100 | -2.00626300 |

**Ti(Pc)<sub>2</sub><sup>+</sup> D<sub>4d</sub> symmetry**

|    |             |             |            |   |             |             |             |
|----|-------------|-------------|------------|---|-------------|-------------|-------------|
| Ti | 0.00000000  | 0.00000000  | 0.00000000 | H | -7.27374900 | 1.22851000  | 2.58995200  |
| N  | 0.00000000  | 1.91164700  | 1.18719700 | H | -7.27374900 | -1.22851000 | 2.58995200  |
| N  | 0.00000000  | -1.91164700 | 1.18719700 | N | -1.35173800 | 1.35173800  | -1.18719700 |
| N  | 1.91164700  | 0.00000000  | 1.18719700 | N | 1.35173800  | -1.35173800 | -1.18719700 |
| N  | -1.91164700 | 0.00000000  | 1.18719700 | N | -1.35173800 | -1.35173800 | -1.18719700 |
| N  | 2.35450400  | 2.35450400  | 1.49105200 | N | 1.35173800  | 1.35173800  | -1.18719700 |
| N  | -2.35450400 | -2.35450400 | 1.49105200 | N | -3.32977100 | 0.00000000  | -1.49105200 |
| N  | 2.35450400  | -2.35450400 | 1.49105200 | N | 3.32977100  | 0.00000000  | -1.49105200 |
| N  | -2.35450400 | 2.35450400  | 1.49105200 | N | 0.00000000  | -3.32977100 | -1.49105200 |
| C  | 1.09313600  | 2.70682300  | 1.43273100 | N | 0.00000000  | 3.32977100  | -1.49105200 |
| C  | -1.09313600 | 2.70682300  | 1.43273100 | C | -2.68697700 | 1.14104900  | -1.43273100 |
| C  | 2.70682300  | -1.09313600 | 1.43273100 | C | -1.14104900 | 2.68697700  | -1.43273100 |
| C  | 2.70682300  | 1.09313600  | 1.43273100 | C | -1.14104900 | -2.68697700 | -1.43273100 |
| C  | -1.09313600 | -2.70682300 | 1.43273100 | C | -2.68697700 | -1.14104900 | -1.43273100 |
| C  | 1.09313600  | -2.70682300 | 1.43273100 | C | 2.68697700  | -1.14104900 | -1.43273100 |
| C  | -2.70682300 | 1.09313600  | 1.43273100 | C | 1.14104900  | -2.68697700 | -1.43273100 |
| C  | -2.70682300 | -1.09313600 | 1.43273100 | C | 1.14104900  | 2.68697700  | -1.43273100 |
| C  | 0.69455200  | 4.06552600  | 1.74878700 | C | 2.68697700  | 1.14104900  | -1.43273100 |
| C  | -0.69455200 | 4.06552600  | 1.74878700 | C | -3.36588300 | 2.38363800  | -1.74878700 |
| C  | 4.06552600  | -0.69455200 | 1.74878700 | C | -2.38363800 | 3.36588300  | -1.74878700 |
| C  | 4.06552600  | 0.69455200  | 1.74878700 | C | -2.38363800 | -3.36588300 | -1.74878700 |
| C  | -0.69455200 | -4.06552600 | 1.74878700 | C | -3.36588300 | -2.38363800 | -1.74878700 |
| C  | 0.69455200  | -4.06552600 | 1.74878700 | C | 3.36588300  | -2.38363800 | -1.74878700 |
| C  | -4.06552600 | 0.69455200  | 1.74878700 | C | 2.38363800  | -3.36588300 | -1.74878700 |
| C  | -4.06552600 | -0.69455200 | 1.74878700 | C | 2.38363800  | 3.36588300  | -1.74878700 |
| C  | 1.42360700  | 5.20532100  | 2.05955400 | C | 3.36588300  | 2.38363800  | -1.74878700 |
| C  | -1.42360700 | 5.20532100  | 2.05955400 | C | -4.68736000 | 2.67407500  | -2.05955400 |
| C  | 0.70098200  | 6.35611800  | 2.35010900 | C | -2.67407500 | 4.68736000  | -2.05955400 |
| C  | -0.70098200 | 6.35611800  | 2.35010900 | C | -4.99012300 | 3.99878500  | -2.35010900 |
| C  | 5.20532100  | -1.42360700 | 2.05955400 | C | -3.99878500 | 4.99012300  | -2.35010900 |
| C  | 5.20532100  | 1.42360700  | 2.05955400 | C | -2.67407500 | -4.68736000 | -2.05955400 |
| C  | 6.35611800  | -0.70098200 | 2.35010900 | C | -4.68736000 | -2.67407500 | -2.05955400 |
| C  | 6.35611800  | 0.70098200  | 2.35010900 | C | -3.99878500 | -4.99012300 | -2.35010900 |
| C  | -1.42360700 | -5.20532100 | 2.05955400 | C | -4.99012300 | -3.99878500 | -2.35010900 |
| C  | 1.42360700  | -5.20532100 | 2.05955400 | C | 4.68736000  | -2.67407500 | -2.05955400 |
| C  | -0.70098200 | -6.35611800 | 2.35010900 | C | 2.67407500  | -4.68736000 | -2.05955400 |
| C  | 0.70098200  | -6.35611800 | 2.35010900 | C | 4.99012300  | -3.99878500 | -2.35010900 |
| C  | -5.20532100 | 1.42360700  | 2.05955400 | C | 3.99878500  | 4.99012300  | -2.35010900 |
| C  | -5.20532100 | -1.42360700 | 2.05955400 | C | 4.99012300  | 3.99878500  | -2.35010900 |
| C  | -6.35611800 | 0.70098200  | 2.35010900 | H | -5.44417200 | 1.89777900  | -2.07184000 |
| C  | -6.35611800 | -0.70098200 | 2.35010900 | H | -1.89777900 | 5.44417200  | -2.07184000 |
| H  | 2.50767800  | 5.19154300  | 2.07184000 | H | -6.01200500 | 4.27462900  | -2.58995200 |
| H  | -2.50767800 | 5.19154300  | 2.07184000 | H | -4.27462900 | 6.01200500  | -2.58995200 |
| H  | 1.22851000  | 7.27374900  | 2.58995200 | H | -1.89777900 | -5.44417200 | -2.07184000 |
| H  | -1.22851000 | 7.27374900  | 2.58995200 | H | -5.44417200 | -1.89777900 | -2.07184000 |
| H  | 5.19154300  | -2.50767800 | 2.07184000 | H | -4.27462900 | -6.01200500 | -2.58995200 |
| H  | 5.19154300  | 2.50767800  | 2.07184000 | H | -6.01200500 | -4.27462900 | -2.58995200 |
| H  | 7.27374900  | -1.22851000 | 2.58995200 | H | 5.44417200  | -1.89777900 | -2.07184000 |
| H  | 7.27374900  | 1.22851000  | 2.58995200 | H | 1.89777900  | -5.44417200 | -2.07184000 |
| H  | -2.50767800 | -5.19154300 | 2.07184000 | H | 6.01200500  | -4.27462900 | -2.58995200 |
| H  | 2.50767800  | -5.19154300 | 2.07184000 | H | 4.27462900  | -6.01200500 | -2.58995200 |
| H  | -1.22851000 | -7.27374900 | 2.58995200 | H | 1.89777900  | 5.44417200  | -2.07184000 |
| H  | 1.22851000  | -7.27374900 | 2.58995200 | H | 5.44417200  | 1.89777900  | -2.07184000 |
| H  | -5.19154300 | 2.50767800  | 2.07184000 | H | 4.27462900  | 6.01200500  | -2.58995200 |
| H  | -5.19154300 | -2.50767800 | 2.07184000 | H | 6.01200500  | 4.27462900  | -2.58995200 |

## Sn(Pc)<sub>2</sub> D<sub>2</sub> symmetry

|    |             |             |            |   |             |             |             |
|----|-------------|-------------|------------|---|-------------|-------------|-------------|
| Sn | 0.00000000  | 0.00000000  | 0.00000000 | H | -6.22203400 | 3.68795800  | 3.02519200  |
| N  | 0.75320400  | 1.71727700  | 1.36832500 | H | -7.28489200 | 1.59143200  | 2.29381300  |
| N  | -0.75320400 | -1.71727700 | 1.36832500 | N | -0.75320400 | 1.71727700  | -1.36832500 |
| N  | 1.79704700  | -0.76352900 | 1.08295300 | N | 0.75320400  | -1.71727700 | -1.36832500 |
| N  | -1.79704700 | 0.76352900  | 1.08295300 | N | -1.79704700 | -0.76352900 | -1.08295300 |
| N  | 3.14741400  | 1.27819500  | 1.33187400 | N | 1.79704700  | 0.76352900  | -1.08295300 |
| N  | -3.14741400 | -1.27819500 | 1.33187400 | N | -3.14741400 | 1.27819500  | -1.33187400 |
| N  | 1.24733400  | -2.93451000 | 1.93792800 | N | 3.14741400  | -1.27819500 | -1.33187400 |
| N  | -1.24733400 | 2.93451000  | 1.93792800 | N | -1.24733400 | -2.93451000 | -1.93792800 |
| C  | 2.12049600  | 1.99261800  | 1.56579000 | N | 1.24733400  | 2.93451000  | -1.93792800 |
| C  | 0.05219100  | 2.76906200  | 1.84105200 | C | -2.12049600 | 1.99261800  | -1.56579000 |
| C  | 2.07688200  | -1.94220600 | 1.60500800 | C | -0.05219100 | 2.76906200  | -1.84105200 |
| C  | 3.04267700  | -0.03940000 | 0.79773600 | C | -2.07688200 | -1.94220600 | -1.60500800 |
| C  | -2.12049600 | -1.99261800 | 1.56579000 | C | -3.04267700 | -0.03940000 | -0.79773600 |
| C  | -0.05219100 | -2.76906200 | 1.84105200 | C | 2.12049600  | -1.99261800 | -1.56579000 |
| C  | -2.07688200 | 1.94220600  | 1.60500800 | C | 0.05219100  | -2.76906200 | -1.84105200 |
| C  | -3.04267700 | 0.03940000  | 0.79773600 | C | 2.07688200  | 1.94220600  | -1.60500800 |
| C  | 2.24781100  | 3.33853500  | 2.15581400 | C | 3.04267700  | 0.03940000  | -0.79773600 |
| C  | 0.96050900  | 3.81911100  | 2.32651100 | C | -2.12049600 | 3.33853500  | -2.15581400 |
| C  | 3.51840400  | -2.08322800 | 1.82552500 | C | -0.96050900 | 3.81911100  | -2.32651100 |
| C  | 4.12038500  | -0.92190200 | 1.36885000 | C | -3.51840400 | -2.08322800 | -1.82552500 |
| C  | -2.24781100 | -3.33853500 | 2.15581400 | C | -4.12038500 | -0.92190200 | -1.36885000 |
| C  | -0.96050900 | -3.81911100 | 2.32651100 | C | 2.24781100  | -3.33853500 | -2.15581400 |
| C  | -3.51840400 | 2.08322800  | 1.82552500 | C | 0.96050900  | -3.81911100 | -2.32651100 |
| C  | -4.12038500 | 0.92190200  | 1.36885000 | C | 3.51840400  | 2.08322800  | -1.82552500 |
| C  | 3.35281700  | 4.08223600  | 2.52941700 | C | 4.12038500  | 0.92190200  | -1.36885000 |
| C  | 0.71423800  | 5.06451300  | 2.87935800 | C | -3.35281700 | 4.08223600  | -2.52941700 |
| C  | 3.11873400  | 5.34134800  | 3.07749800 | C | -0.71423800 | 5.06451300  | -2.87935800 |
| C  | 1.81925500  | 5.82595600  | 3.25013800 | C | -3.11873400 | 5.34134800  | -3.07749800 |
| C  | 4.24591400  | -3.10447700 | 2.41900600 | C | -1.81925500 | 5.82595600  | -3.25013800 |
| C  | 5.47585000  | -0.70930000 | 1.54727800 | C | -4.24591400 | -3.10447700 | -2.41900600 |
| C  | 5.61506300  | -2.91565700 | 2.56272300 | C | -5.47585000 | -0.70930000 | -1.54727800 |
| C  | 6.21793900  | -1.72739900 | 2.14268900 | C | -5.61506300 | -2.91565700 | -2.56272300 |
| C  | -3.35281700 | -4.08223600 | 2.52941700 | C | -6.21793900 | -1.72739900 | -2.14268900 |
| C  | -0.71423800 | -5.06451300 | 2.87935800 | C | 3.35281700  | -4.08223600 | -2.52941700 |
| C  | -3.11873400 | -5.34134800 | 3.07749800 | C | 0.71423800  | -5.06451300 | -2.87935800 |
| C  | -1.81925500 | -5.82595600 | 3.25013800 | C | 3.11873400  | -5.34134800 | -3.07749800 |
| C  | -4.24591400 | 3.10447700  | 2.41900600 | C | 1.81925500  | -5.82595600 | -3.25013800 |
| C  | -5.47585000 | 0.70930000  | 1.54727800 | C | 4.24591400  | 3.10447700  | -2.41900600 |
| C  | -5.61506300 | 2.91565700  | 2.56272300 | C | 5.47585000  | 0.70930000  | -1.54727800 |
| C  | -6.21793900 | 1.72739900  | 2.14268900 | C | 5.61506300  | 2.91565700  | -2.56272300 |
| H  | 4.35594800  | 3.69226700  | 2.39453300 | C | 6.21793900  | 1.72739900  | -2.14268900 |
| H  | -0.30122600 | 5.42215600  | 3.01038400 | H | -4.35594800 | 3.69226700  | -2.39453300 |
| H  | 3.95938800  | 5.95946000  | 3.37825900 | H | 0.30122600  | 5.42215600  | -3.01038400 |
| H  | 1.67283900  | 6.81131100  | 3.68212100 | H | -3.95938800 | 5.95946000  | -3.37825900 |
| H  | 3.74800500  | -4.00343600 | 2.76579000 | H | -1.67283900 | 6.81131100  | -3.68212100 |
| H  | 5.93923300  | 0.22503900  | 1.25081400 | H | -3.74800500 | -4.00343600 | -2.76579000 |
| H  | 6.22203400  | -3.68795800 | 3.02519200 | H | -5.93923300 | 0.22503900  | -1.25081400 |
| H  | 7.28489200  | -1.59143200 | 2.29381300 | H | -6.22203400 | -3.68795800 | -3.02519200 |
| H  | -4.35594800 | -3.69226700 | 2.39453300 | H | -7.28489200 | -1.59143200 | -2.29381300 |
| H  | 0.30122600  | -5.42215600 | 3.01038400 | H | 4.35594800  | -3.69226700 | -2.39453300 |
| H  | -3.95938800 | -5.95946000 | 3.37825900 | H | -0.30122600 | -5.42215600 | -3.01038400 |
| H  | -1.67283900 | -6.81131100 | 3.68212100 | H | 3.95938800  | -5.95946000 | -3.37825900 |
| H  | -3.74800500 | 4.00343600  | 2.76579000 | H | 1.67283900  | -6.81131100 | -3.68212100 |
| H  | -5.93923300 | -0.22503900 | 1.25081400 | H | 3.74800500  | 4.00343600  | -2.76579000 |
|    |             |             |            | H | 5.93923300  | -0.22503900 | -1.25081400 |
|    |             |             |            | H | 6.22203400  | 3.68795800  | -3.02519200 |
|    |             |             |            | H | 7.28489200  | 1.59143200  | -2.29381300 |

## Sn(Pc)<sub>2</sub> D<sub>4d</sub> symmetry

|    |             |             |            |   |             |             |             |
|----|-------------|-------------|------------|---|-------------|-------------|-------------|
| Sn | 0.00000000  | 0.00000000  | 0.00000000 | H | 7.31303500  | 1.23044700  | 2.60144900  |
| N  | 0.00000000  | 1.94734700  | 1.27010200 | H | 7.31303500  | -1.23044700 | 2.60144900  |
| N  | 0.00000000  | -1.94734700 | 1.27010200 | N | 1.37698200  | 1.37698200  | -1.27010200 |
| N  | -1.94734700 | 0.00000000  | 1.27010200 | N | -1.37698200 | -1.37698200 | -1.27010200 |
| N  | 1.94734700  | 0.00000000  | 1.27010200 | N | 1.37698200  | -1.37698200 | -1.27010200 |
| N  | -2.36256300 | 2.36256300  | 1.56153900 | N | -1.37698200 | 1.37698200  | -1.27010200 |
| N  | 2.36256300  | -2.36256300 | 1.56153900 | N | 3.34116900  | 0.00000000  | -1.56153900 |
| N  | -2.36256300 | -2.36256300 | 1.56153900 | N | -3.34116900 | 0.00000000  | -1.56153900 |
| N  | 2.36256300  | 2.36256300  | 1.56153900 | N | 0.00000000  | -3.34116900 | -1.56153900 |
| C  | -1.10197100 | 2.73039500  | 1.50432400 | N | 0.00000000  | 3.34116900  | -1.56153900 |
| C  | 1.10197100  | -2.73039500 | 1.50432400 | C | 2.70989200  | 1.15147000  | -1.50432400 |
| C  | -2.73039500 | -1.10197100 | 1.50432400 | C | -2.70989200 | -1.15147000 | -1.50432400 |
| C  | 2.73039500  | 1.10197100  | 1.50432400 | C | 1.15147000  | -2.70989200 | -1.50432400 |
| C  | 1.10197100  | 2.73039500  | 1.50432400 | C | -1.15147000 | 2.70989200  | -1.50432400 |
| C  | -1.10197100 | -2.73039500 | 1.50432400 | C | 1.15147000  | 2.70989200  | -1.50432400 |
| C  | -2.73039500 | 1.10197100  | 1.50432400 | C | -1.15147000 | -2.70989200 | -1.50432400 |
| C  | 2.73039500  | -1.10197100 | 1.50432400 | C | 2.70989200  | -1.15147000 | -1.50432400 |
| C  | -0.69712000 | 4.08834400  | 1.80594100 | C | -2.70989200 | 1.15147000  | -1.50432400 |
| C  | 0.69712000  | 4.08834400  | 1.80594100 | C | 3.38383400  | 2.39795800  | -1.80594100 |
| C  | -1.42170400 | 5.23820200  | 2.10096200 | C | 2.39795800  | 3.38383400  | -1.80594100 |
| C  | 1.42170400  | 5.23820200  | 2.10096200 | C | 4.70926500  | 2.69867100  | -2.10096200 |
| C  | -0.70216400 | 6.39132400  | 2.37669800 | C | 2.69867100  | 4.70926500  | -2.10096200 |
| C  | 0.70216400  | 6.39132400  | 2.37669800 | C | 5.01585400  | 4.02284400  | -2.37669800 |
| H  | -2.50618200 | 5.22372200  | 2.10756100 | C | 4.02284400  | 5.01585400  | -2.37669800 |
| H  | 2.50618200  | 5.22372200  | 2.10756100 | H | 5.46586700  | 1.92159000  | -2.10756100 |
| H  | -1.23044700 | 7.31303500  | 2.60144900 | H | 1.92159000  | 5.46586700  | -2.10756100 |
| H  | 1.23044700  | 7.31303500  | 2.60144900 | H | 6.04115400  | 4.30103900  | -2.60144900 |
| C  | 0.69712000  | -4.08834400 | 1.80594100 | H | 4.30103900  | 6.04115400  | -2.60144900 |
| C  | -0.69712000 | -4.08834400 | 1.80594100 | C | -3.38383400 | -2.39795800 | -1.80594100 |
| C  | 1.42170400  | -5.23820200 | 2.10096200 | C | -2.39795800 | -3.38383400 | -1.80594100 |
| C  | -1.42170400 | -5.23820200 | 2.10096200 | C | -4.70926500 | -2.69867100 | -2.10096200 |
| C  | 0.70216400  | -6.39132400 | 2.37669800 | C | -2.69867100 | -4.70926500 | -2.10096200 |
| C  | -0.70216400 | -6.39132400 | 2.37669800 | C | -5.01585400 | -4.02284400 | -2.37669800 |
| H  | 2.50618200  | -5.22372200 | 2.10756100 | C | -4.02284400 | -5.01585400 | -2.37669800 |
| H  | -2.50618200 | -5.22372200 | 2.10756100 | H | -5.46586700 | -1.92159000 | -2.10756100 |
| H  | 1.23044700  | -7.31303500 | 2.60144900 | H | -1.92159000 | -5.46586700 | -2.10756100 |
| H  | -1.23044700 | -7.31303500 | 2.60144900 | H | -6.04115400 | -4.30103900 | -2.60144900 |
| C  | -4.08834400 | -0.69712000 | 1.80594100 | H | -4.30103900 | -6.04115400 | -2.60144900 |
| C  | -4.08834400 | 0.69712000  | 1.80594100 | C | 2.39795800  | -3.38383400 | -1.80594100 |
| C  | -5.23820200 | -1.42170400 | 2.10096200 | C | 3.38383400  | -2.39795800 | -1.80594100 |
| C  | -5.23820200 | 1.42170400  | 2.10096200 | C | 2.69867100  | -4.70926500 | -2.10096200 |
| C  | -6.39132400 | -0.70216400 | 2.37669800 | C | 4.70926500  | -2.69867100 | -2.10096200 |
| C  | -6.39132400 | 0.70216400  | 2.37669800 | C | 4.02284400  | -5.01585400 | -2.37669800 |
| H  | -5.22372200 | -2.50618200 | 2.10756100 | H | 1.92159000  | -5.46586700 | -2.10756100 |
| H  | -5.22372200 | 2.50618200  | 2.10756100 | H | 5.46586700  | -1.92159000 | -2.10756100 |
| H  | -7.31303500 | -1.23044700 | 2.60144900 | H | 4.30103900  | -6.04115400 | -2.60144900 |
| H  | -7.31303500 | 1.23044700  | 2.60144900 | H | 6.04115400  | -4.30103900 | -2.60144900 |
| C  | 4.08834400  | 0.69712000  | 1.80594100 | C | -2.39795800 | 3.38383400  | -1.80594100 |
| C  | 4.08834400  | -0.69712000 | 1.80594100 | C | -3.38383400 | 2.39795800  | -1.80594100 |
| C  | 5.23820200  | 1.42170400  | 2.10096200 | C | -2.69867100 | 4.70926500  | -2.10096200 |
| C  | 5.23820200  | -1.42170400 | 2.10096200 | C | -4.70926500 | 2.69867100  | -2.10096200 |
| C  | 6.39132400  | 0.70216400  | 2.37669800 | C | -4.02284400 | 5.01585400  | -2.37669800 |
| C  | 6.39132400  | -0.70216400 | 2.37669800 | H | -1.92159000 | 5.46586700  | -2.10756100 |
| H  | 5.22372200  | 2.50618200  | 2.10756100 | H | -5.46586700 | 1.92159000  | -2.10756100 |
| H  | 5.22372200  | -2.50618200 | 2.10756100 | H | -4.30103900 | 6.04115400  | -2.60144900 |
|    |             |             |            | H | -6.04115400 | 4.30103900  | -2.60144900 |

## Sn(Pc)<sub>2</sub><sup>+</sup> D<sub>2</sub> symmetry

|    |             |             |            |   |             |             |             |
|----|-------------|-------------|------------|---|-------------|-------------|-------------|
| Sn | 0.00000000  | 0.00000000  | 0.00000000 | H | -6.33736400 | 3.96791300  | 2.24191100  |
| N  | 0.73570600  | 1.78117600  | 1.24719600 | H | -7.29078400 | 1.70323800  | 2.21377100  |
| N  | -0.73570600 | -1.78117600 | 1.24719600 | N | -0.73570600 | 1.78117600  | -1.24719600 |
| N  | 1.79691200  | -0.74819400 | 1.21713300 | N | 0.73570600  | -1.78117600 | -1.24719600 |
| N  | -1.79691200 | 0.74819400  | 1.21713300 | N | -1.79691200 | -0.74819400 | -1.21713300 |
| N  | 3.09602100  | 1.28260800  | 1.46191000 | N | 1.79691200  | 0.74819400  | -1.21713300 |
| N  | -3.09602100 | -1.28260800 | 1.46191000 | N | -3.09602100 | 1.28260800  | -1.46191000 |
| N  | 1.27874200  | -3.09518400 | 1.47108300 | N | 3.09602100  | -1.28260800 | -1.46191000 |
| N  | -1.27874200 | 3.09518400  | 1.47108300 | N | -1.27874200 | -3.09518400 | -1.47108300 |
| C  | 2.07050200  | 2.09263900  | 1.43201100 | N | 1.27874200  | 3.09518400  | -1.47108300 |
| C  | 0.02357000  | 2.93059500  | 1.45114700 | C | -2.07050200 | 2.09263900  | -1.43201100 |
| C  | 2.10847300  | -2.06288500 | 1.39577400 | C | -0.02357000 | 2.93059500  | -1.45114700 |
| C  | 2.96539100  | -0.02986000 | 1.36679400 | C | -2.10847300 | -2.06288500 | -1.39577400 |
| C  | -2.07050200 | -2.09263900 | 1.43201100 | C | -2.96539100 | -0.02986000 | -1.36679400 |
| C  | -0.02357000 | -2.93059500 | 1.45114700 | C | 2.07050200  | -2.09263900 | -1.43201100 |
| C  | -2.10847300 | 2.06288500  | 1.39577400 | C | 0.02357000  | -2.93059500 | -1.45114700 |
| C  | -2.96539100 | 0.02986000  | 1.36679400 | C | 2.10847300  | 2.06288500  | -1.39577400 |
| C  | 2.21465000  | 3.51478100  | 1.71792200 | C | 2.96539100  | 0.02986000  | -1.36679400 |
| C  | 0.92831700  | 4.04265600  | 1.73226200 | C | -2.21465000 | 3.51478100  | -1.71792200 |
| C  | 3.53555600  | -2.21718100 | 1.62138400 | C | -0.92831700 | 4.04265600  | -1.73226200 |
| C  | 4.07592900  | -0.93102100 | 1.60425900 | C | -3.53555600 | -2.21718100 | -1.62138400 |
| C  | -2.21465000 | -3.51478100 | 1.71792200 | C | -4.07592900 | -0.93102100 | -1.60425900 |
| C  | -0.92831700 | -4.04265600 | 1.73226200 | C | 2.21465000  | -3.51478100 | -1.71792200 |
| C  | -3.53555600 | 2.21718100  | 1.62138400 | C | 0.92831700  | -4.04265600 | -1.73226200 |
| C  | -4.07592900 | 0.93102100  | 1.60425900 | C | 3.53555600  | 2.21718100  | -1.62138400 |
| C  | 3.32499300  | 4.30147100  | 1.97675700 | C | 4.07592900  | 0.93102100  | -1.60425900 |
| C  | 0.69393000  | 5.37926900  | 2.00880500 | C | -3.32499300 | 4.30147100  | -1.97675700 |
| C  | 3.09973200  | 5.65088600  | 2.23891100 | C | -0.69393000 | 5.37926900  | -2.00880500 |
| C  | 1.80613900  | 6.18110900  | 2.25552200 | C | -3.09973200 | 5.65088600  | -2.23891100 |
| C  | 4.32380600  | -3.33409800 | 1.85744000 | C | -1.80613900 | 6.18110900  | -2.25552200 |
| C  | 5.42905800  | -0.71216300 | 1.82384900 | C | -4.32380600 | -3.33409800 | -1.85744000 |
| C  | 5.68332800  | -3.12146800 | 2.05881300 | C | -5.42905800 | -0.71216300 | -1.82384900 |
| C  | 6.22656300  | -1.83034000 | 2.04270000 | C | -5.68332800 | -3.12146800 | -2.05881300 |
| C  | -3.32499300 | -4.30147100 | 1.97675700 | C | -6.22656300 | -1.83034000 | -2.04270000 |
| C  | -0.69393000 | -5.37926900 | 2.00880500 | C | 3.32499300  | -4.30147100 | -1.97675700 |
| C  | -3.09973200 | -5.65088600 | 2.23891100 | C | 0.69393000  | -5.37926900 | -2.00880500 |
| C  | -1.80613900 | -6.18110900 | 2.25552200 | C | 3.09973200  | -5.65088600 | -2.23891100 |
| C  | -4.32380600 | 3.33409800  | 1.85744000 | C | 1.80613900  | -6.18110900 | -2.25552200 |
| C  | -5.42905800 | 0.71216300  | 1.82384900 | C | 4.32380600  | 3.33409800  | -1.85744000 |
| C  | -5.68332800 | 3.12146800  | 2.05881300 | C | 5.42905800  | 0.71216300  | -1.82384900 |
| C  | -6.22656300 | 1.83034000  | 2.04270000 | C | 5.68332800  | 3.12146800  | -2.05881300 |
| H  | 4.32336000  | 3.87847300  | 1.97339300 | C | 6.22656300  | 1.83034000  | -2.04270000 |
| H  | -0.31455500 | 5.77707700  | 2.03092500 | H | -4.32336000 | 3.87847300  | -1.97339300 |
| H  | 3.94197400  | 6.30455100  | 2.44192600 | H | 0.31455500  | 5.77707700  | -2.03092500 |
| H  | 1.66899300  | 7.23572500  | 2.47165800 | H | -3.94197400 | 6.30455100  | -2.44192600 |
| H  | 3.89019700  | -4.32761600 | 1.88261800 | H | -1.66899300 | 7.23572500  | -2.47165800 |
| H  | 5.84006800  | 0.29125200  | 1.82338800 | H | -3.89019700 | -4.32761600 | -1.88261800 |
| H  | 6.33736400  | -3.96791300 | 2.24191100 | H | -5.84006800 | 0.29125200  | -1.82338800 |
| H  | 7.29078400  | -1.70323800 | 2.21377100 | H | -6.33736400 | -3.96791300 | -2.24191100 |
| H  | -4.32336000 | -3.87847300 | 1.97339300 | H | -7.29078400 | -1.70323800 | -2.21377100 |
| H  | 0.31455500  | -5.77707700 | 2.03092500 | H | 4.32336000  | -3.87847300 | -1.97339300 |
| H  | -3.94197400 | -6.30455100 | 2.44192600 | H | -0.31455500 | -5.77707700 | -2.03092500 |
| H  | -1.66899300 | -7.23572500 | 2.47165800 | H | 3.94197400  | -6.30455100 | -2.44192600 |
| H  | -3.89019700 | 4.32761600  | 1.88261800 | H | 1.66899300  | -7.23572500 | -2.47165800 |
| H  | -5.84006800 | -0.29125200 | 1.82338800 | H | 3.89019700  | 4.32761600  | -1.88261800 |
|    |             |             |            | H | 5.84006800  | -0.29125200 | -1.82338800 |
|    |             |             |            | H | 6.33736400  | 3.96791300  | -2.24191100 |
|    |             |             |            | H | 7.29078400  | 1.70323800  | -2.21377100 |



## Sn(Pc)<sub>2</sub><sup>+</sup> D<sub>4d</sub> symmetry

|    |             |             |            |   |             |             |             |
|----|-------------|-------------|------------|---|-------------|-------------|-------------|
| Sn | 0.00000000  | 0.00000000  | 0.00000000 | H | -7.31838800 | 1.22861500  | 2.55020500  |
| N  | 0.00000000  | 1.94106200  | 1.25588500 | H | -7.31838800 | -1.22861500 | 2.55020500  |
| N  | 0.00000000  | -1.94106200 | 1.25588500 | N | -1.37253800 | 1.37253800  | -1.25588500 |
| N  | 1.94106200  | 0.00000000  | 1.25588500 | N | 1.37253800  | -1.37253800 | -1.25588500 |
| N  | -1.94106200 | 0.00000000  | 1.25588500 | N | -1.37253800 | -1.37253800 | -1.25588500 |
| N  | 2.36296100  | 2.36296100  | 1.52966800 | N | 1.37253800  | 1.37253800  | -1.25588500 |
| N  | -2.36296100 | -2.36296100 | 1.52966800 | N | -3.34173100 | 0.00000000  | -1.52966800 |
| N  | 2.36296100  | -2.36296100 | 1.52966800 | N | 3.34173100  | 0.00000000  | -1.52966800 |
| N  | -2.36296100 | 2.36296100  | 1.52966800 | N | 0.00000000  | -3.34173100 | -1.52966800 |
| C  | 1.10139800  | 2.72941900  | 1.47629800 | N | 0.00000000  | 3.34173100  | -1.52966800 |
| C  | -1.10139800 | 2.72941900  | 1.47629800 | C | -2.70879700 | 1.15118500  | -1.47629800 |
| C  | 2.72941900  | -1.10139800 | 1.47629800 | C | -1.15118500 | 2.70879700  | -1.47629800 |
| C  | 2.72941900  | 1.10139800  | 1.47629800 | C | -1.15118500 | -2.70879700 | -1.47629800 |
| C  | -1.10139800 | -2.72941900 | 1.47629800 | C | -2.70879700 | -1.15118500 | -1.47629800 |
| C  | 1.10139800  | -2.72941900 | 1.47629800 | C | 2.70879700  | -1.15118500 | -1.47629800 |
| C  | -2.72941900 | 1.10139800  | 1.47629800 | C | 1.15118500  | -2.70879700 | -1.47629800 |
| C  | -2.72941900 | -1.10139800 | 1.47629800 | C | 1.15118500  | 2.70879700  | -1.47629800 |
| C  | 0.69648500  | 4.09343600  | 1.76770600 | C | 2.70879700  | 1.15118500  | -1.47629800 |
| C  | -0.69648500 | 4.09343600  | 1.76770600 | C | -3.38698600 | 2.40200700  | -1.76770600 |
| C  | 4.09343600  | -0.69648500 | 1.76770600 | C | -2.40200700 | 3.38698600  | -1.76770600 |
| C  | 4.09343600  | 0.69648500  | 1.76770600 | C | -2.40200700 | -3.38698600 | -1.76770600 |
| C  | -0.69648500 | -4.09343600 | 1.76770600 | C | -3.38698600 | -2.40200700 | -1.76770600 |
| C  | -4.09343600 | 0.69648500  | 1.76770600 | C | 3.38698600  | -2.40200700 | -1.76770600 |
| C  | -4.09343600 | -0.69648500 | 1.76770600 | C | 2.40200700  | -3.38698600 | -1.76770600 |
| C  | 1.42275700  | 5.24038600  | 2.05647800 | C | 2.40200700  | 3.38698600  | -1.76770600 |
| C  | -1.42275700 | 5.24038600  | 2.05647800 | C | 3.38698600  | 2.40200700  | -1.76770600 |
| C  | 0.70058700  | 6.39691500  | 2.32680700 | C | -4.71155300 | 2.69947100  | -2.05647800 |
| C  | -0.70058700 | 6.39691500  | 2.32680700 | C | -2.69947100 | 4.71155300  | -2.05647800 |
| C  | 5.24038600  | -1.42275700 | 2.05647800 | C | -5.01869200 | 4.02791200  | -2.32680700 |
| C  | 5.24038600  | 1.42275700  | 2.05647800 | C | -4.02791200 | 5.01869200  | -2.32680700 |
| C  | 6.39691500  | -0.70058700 | 2.32680700 | C | -2.69947100 | -4.71155300 | -2.05647800 |
| C  | 6.39691500  | 0.70058700  | 2.32680700 | C | -4.71155300 | -2.69947100 | -2.05647800 |
| C  | -1.42275700 | -5.24038600 | 2.05647800 | C | -4.02791200 | -5.01869200 | -2.32680700 |
| C  | 1.42275700  | -5.24038600 | 2.05647800 | C | -5.01869200 | -4.02791200 | -2.32680700 |
| C  | -0.70058700 | -6.39691500 | 2.32680700 | C | 4.71155300  | -2.69947100 | -2.05647800 |
| C  | 0.70058700  | -6.39691500 | 2.32680700 | C | 2.69947100  | -4.71155300 | -2.05647800 |
| C  | -5.24038600 | 1.42275700  | 2.05647800 | C | 5.01869200  | -4.02791200 | -2.32680700 |
| C  | -5.24038600 | -1.42275700 | 2.05647800 | C | 4.02791200  | -5.01869200 | -2.32680700 |
| C  | -6.39691500 | 0.70058700  | 2.32680700 | C | 2.69947100  | 4.71155300  | -2.05647800 |
| C  | -6.39691500 | -0.70058700 | 2.32680700 | C | 4.71155300  | 2.69947100  | -2.05647800 |
| H  | 2.50691500  | 5.22734000  | 2.06830000 | C | 4.02791200  | 5.01869200  | -2.32680700 |
| H  | -2.50691500 | 5.22734000  | 2.06830000 | C | 5.01869200  | 4.02791200  | -2.32680700 |
| H  | 1.22861500  | 7.31838800  | 2.55020500 | H | -5.46894400 | 1.92363000  | -2.06830000 |
| H  | -1.22861500 | 7.31838800  | 2.55020500 | H | -1.92363000 | 5.46894400  | -2.06830000 |
| H  | 5.22734000  | -2.50691500 | 2.06830000 | H | -6.04364400 | 4.30612000  | -2.55020500 |
| H  | 5.22734000  | 2.50691500  | 2.06830000 | H | -4.30612000 | 6.04364400  | -2.55020500 |
| H  | 7.31838800  | -1.22861500 | 2.55020500 | H | -1.92363000 | -5.46894400 | -2.06830000 |
| H  | 7.31838800  | 1.22861500  | 2.55020500 | H | -5.46894400 | -1.92363000 | -2.06830000 |
| H  | -2.50691500 | -5.22734000 | 2.06830000 | H | -4.30612000 | -6.04364400 | -2.55020500 |
| H  | 2.50691500  | -5.22734000 | 2.06830000 | H | -6.04364400 | -4.30612000 | -2.55020500 |
| H  | -1.22861500 | -7.31838800 | 2.55020500 | H | 5.46894400  | -1.92363000 | -2.06830000 |
| H  | 1.22861500  | -7.31838800 | 2.55020500 | H | 1.92363000  | -5.46894400 | -2.06830000 |
| H  | -5.22734000 | 2.50691500  | 2.06830000 | H | 6.04364400  | -4.30612000 | -2.55020500 |
| H  | -5.22734000 | -2.50691500 | 2.06830000 | H | 4.30612000  | -6.04364400 | -2.55020500 |
|    |             |             |            | H | 1.92363000  | 5.46894400  | -2.06830000 |
|    |             |             |            | H | 5.46894400  | 1.92363000  | -2.06830000 |
|    |             |             |            | H | 4.30612000  | 6.04364400  | -2.55020500 |
|    |             |             |            | H | 6.04364400  | 4.30612000  | -2.55020500 |

**Sc(Pc)<sub>2</sub> D<sub>2</sub> symmetry**

|    |             |             |            |   |             |             |             |
|----|-------------|-------------|------------|---|-------------|-------------|-------------|
| Sc | 0.00000000  | 0.00000000  | 0.00000000 | H | -6.28091100 | 3.71395900  | 2.90600000  |
| N  | 0.75012500  | 1.73249500  | 1.35469600 | H | -7.31641100 | 1.58484400  | 2.23347900  |
| N  | -0.75012500 | -1.73249500 | 1.35469600 | N | -0.75012500 | 1.73249500  | -1.35469600 |
| N  | 1.80947100  | -0.76063700 | 1.09970100 | N | 0.75012500  | -1.73249500 | -1.35469600 |
| N  | -1.80947100 | 0.76063700  | 1.09970100 | N | -1.80947100 | -0.76063700 | -1.09970100 |
| N  | 3.13241800  | 1.28628900  | 1.32686100 | N | 1.80947100  | 0.76063700  | -1.09970100 |
| N  | -3.13241800 | -1.28628900 | 1.32686100 | N | -3.13241800 | 1.28628900  | -1.32686100 |
| N  | 1.25857700  | -2.93703800 | 1.92433100 | N | 3.13241800  | -1.28628900 | -1.32686100 |
| N  | -1.25857700 | 2.93703800  | 1.92433100 | N | -1.25857700 | -2.93703800 | -1.92433100 |
| C  | 2.09978500  | 2.01511100  | 1.55262400 | N | 1.25857700  | 2.93703800  | -1.92433100 |
| C  | 0.04432600  | 2.78285700  | 1.82996300 | C | -2.09978500 | 2.01511100  | -1.55262400 |
| C  | 2.09985000  | -1.94752400 | 1.59366100 | C | -0.04432600 | 2.78285700  | -1.82996300 |
| C  | 3.02952300  | -0.03533300 | 0.86105900 | C | -2.09985000 | -1.94752400 | -1.59366100 |
| C  | -2.09978500 | -2.01511100 | 1.55262400 | C | -3.02952300 | -0.03533300 | -0.86105900 |
| C  | -0.04432600 | -2.78285700 | 1.82996300 | C | 2.09978500  | -2.01511100 | -1.55262400 |
| C  | -2.09985000 | 1.94752400  | 1.59366100 | C | 0.04432600  | -2.78285700 | -1.82996300 |
| C  | -3.02952300 | 0.03533300  | 0.86105900 | C | 2.09985000  | 1.94752400  | -1.59366100 |
| C  | 2.23704600  | 3.36590000  | 2.13220200 | C | 3.02952300  | 0.03533300  | -0.86105900 |
| C  | 0.94720300  | 3.84143100  | 2.31355300 | C | -2.23704600 | 3.36590000  | -2.13220200 |
| C  | 3.54516700  | -2.09712200 | 1.79720500 | C | -0.94720300 | 3.84143100  | -2.31355300 |
| C  | 4.13401800  | -0.91252600 | 1.37661100 | C | -3.54516700 | -2.09712200 | -1.79720500 |
| C  | -2.23704600 | -3.36590000 | 2.13220200 | C | -4.13401800 | -0.91252600 | -1.37661100 |
| C  | -0.94720300 | -3.84143100 | 2.31355300 | C | 2.23704600  | -3.36590000 | -2.13220200 |
| C  | -3.54516700 | 2.09712200  | 1.79720500 | C | 0.94720300  | -3.84143100 | -2.31355300 |
| C  | -4.13401800 | 0.91252600  | 1.37661100 | C | 3.54516700  | 2.09712200  | -1.79720500 |
| C  | 3.34187600  | 4.11500600  | 2.49460200 | C | 4.13401800  | 0.91252600  | -1.37661100 |
| C  | 0.70248000  | 5.08713300  | 2.86519100 | C | -3.34187600 | 4.11500600  | -2.49460200 |
| C  | 3.10767800  | 5.37507100  | 3.04178500 | C | -0.70248000 | 5.08713300  | -2.86519100 |
| C  | 1.80819000  | 5.85413800  | 3.22487100 | C | -3.10767800 | 5.37507100  | -3.04178500 |
| C  | 4.29121600  | -3.12905600 | 2.34662900 | C | -1.80819000 | 5.85413800  | -3.22487100 |
| C  | 5.48929500  | -0.69243600 | 1.54390300 | C | -4.29121600 | -3.12905600 | -2.34662900 |
| C  | 5.66113700  | -2.93159100 | 2.47867400 | C | -5.48929500 | -0.69243600 | -1.54390300 |
| C  | 6.24858000  | -1.72457700 | 2.09249100 | C | -5.66113700 | -2.93159100 | -2.47867400 |
| C  | -3.34187600 | -4.11500600 | 2.49460200 | C | -6.24858000 | -1.72457700 | -2.09249100 |
| C  | -0.70248000 | -5.08713300 | 2.86519100 | C | 3.34187600  | -4.11500600 | -2.49460200 |
| C  | -3.10767800 | -5.37507100 | 3.04178500 | C | 0.70248000  | -5.08713300 | -2.86519100 |
| C  | -1.80819000 | -5.85413800 | 3.22487100 | C | 3.10767800  | -5.37507100 | -3.04178500 |
| C  | -4.29121600 | 3.12905600  | 2.34662900 | C | 1.80819000  | -5.85413800 | -3.22487100 |
| C  | -5.48929500 | 0.69243600  | 1.54390300 | C | 4.29121600  | 3.12905600  | -2.34662900 |
| C  | -5.66113700 | 2.93159100  | 2.47867400 | C | 5.48929500  | 0.69243600  | -1.54390300 |
| C  | -6.24858000 | 1.72457700  | 2.09249100 | C | 5.66113700  | 2.93159100  | -2.47867400 |
| H  | 4.34598400  | 3.73008800  | 2.35225000 | C | 6.24858000  | 1.72457700  | -2.09249100 |
| H  | -0.31262700 | 5.44288000  | 3.00483300 | H | -4.34598400 | 3.73008800  | -2.35225000 |
| H  | 3.94848300  | 5.99744500  | 3.33314800 | H | 0.31262700  | 5.44288000  | -3.00483300 |
| H  | 1.66121600  | 6.83976600  | 3.65609400 | H | -3.94848300 | 5.99744500  | -3.33314800 |
| H  | 3.80883500  | -4.04462500 | 2.67163300 | H | -1.66121600 | 6.83976600  | -3.65609400 |
| H  | 5.93988700  | 0.25546600  | 1.27160700 | H | -3.80883500 | -4.04462500 | -2.67163300 |
| H  | 6.28091100  | -3.71395900 | 2.90600000 | H | -5.93988700 | 0.25546600  | -1.27160700 |
| H  | 7.31641100  | -1.58484400 | 2.23347900 | H | -6.28091100 | -3.71395900 | -2.90600000 |
| H  | -4.34598400 | -3.73008800 | 2.35225000 | H | -7.31641100 | -1.58484400 | -2.23347900 |
| H  | 0.31262700  | -5.44288000 | 3.00483300 | H | 4.34598400  | -3.73008800 | -2.35225000 |
| H  | -3.94848300 | -5.99744500 | 3.33314800 | H | -0.31262700 | -5.44288000 | -3.00483300 |
| H  | -1.66121600 | -6.83976600 | 3.65609400 | H | 3.94848300  | -5.99744500 | -3.33314800 |
| H  | -3.80883500 | 4.04462500  | 2.67163300 | H | 1.66121600  | -6.83976600 | -3.65609400 |
| H  | -5.93988700 | -0.25546600 | 1.27160700 | H | 3.80883500  | 4.04462500  | -2.67163300 |
|    |             |             |            | H | 5.93988700  | -0.25546600 | -1.27160700 |
|    |             |             |            | H | 6.28091100  | 3.71395900  | -2.90600000 |
|    |             |             |            | H | 7.31641100  | 1.58484400  | -2.23347900 |

**Sc(Pc)<sub>2</sub> D<sub>4d</sub> symmetry**

|    |             |             |            |   |             |             |             |
|----|-------------|-------------|------------|---|-------------|-------------|-------------|
| Sc | 0.00000000  | 0.00000000  | 0.00000000 | H | -7.33177400 | 1.22965500  | 2.57277400  |
| N  | 0.00000000  | 1.95376100  | 1.27018800 | H | -7.33177400 | -1.22965500 | 2.57277400  |
| N  | 0.00000000  | -1.95376100 | 1.27018800 | N | -1.38151800 | 1.38151800  | -1.27018800 |
| N  | 1.95376100  | 0.00000000  | 1.27018800 | N | 1.38151800  | -1.38151800 | -1.27018800 |
| N  | -1.95376100 | 0.00000000  | 1.27018800 | N | -1.38151800 | -1.38151800 | -1.27018800 |
| N  | 2.36100000  | 2.36100000  | 1.56167600 | N | 1.38151800  | 1.38151800  | -1.27018800 |
| N  | -2.36100000 | -2.36100000 | 1.56167600 | N | -3.33895800 | 0.00000000  | -1.56167600 |
| N  | 2.36100000  | -2.36100000 | 1.56167600 | N | 3.33895800  | 0.00000000  | -1.56167600 |
| N  | -2.36100000 | 2.36100000  | 1.56167600 | N | 0.00000000  | -3.33895800 | -1.56167600 |
| C  | 1.09594600  | 2.73038900  | 1.50287700 | N | 0.00000000  | 3.33895800  | -1.56167600 |
| C  | -1.09594600 | 2.73038900  | 1.50287700 | C | -2.70562700 | 1.15572600  | -1.50287700 |
| C  | 2.73038900  | -1.09594600 | 1.50287700 | C | -1.15572600 | 2.70562700  | -1.50287700 |
| C  | 2.73038900  | 1.09594600  | 1.50287700 | C | -1.15572600 | -2.70562700 | -1.50287700 |
| C  | -1.09594600 | -2.73038900 | 1.50287700 | C | -2.70562700 | -1.15572600 | -1.50287700 |
| C  | 1.09594600  | -2.73038900 | 1.50287700 | C | 2.70562700  | -1.15572600 | -1.50287700 |
| C  | -2.73038900 | 1.09594600  | 1.50287700 | C | 1.15572600  | -2.70562700 | -1.50287700 |
| C  | -2.73038900 | -1.09594600 | 1.50287700 | C | 1.15572600  | 2.70562700  | -1.50287700 |
| C  | 0.69667500  | 4.10186000  | 1.80172200 | C | 2.70562700  | 1.15572600  | -1.50287700 |
| C  | -0.69667500 | 4.10186000  | 1.80172200 | C | -3.39307700 | 2.40782900  | -1.80172200 |
| C  | 4.10186000  | -0.69667500 | 1.80172200 | C | -2.40782900 | 3.39307700  | -1.80172200 |
| C  | 4.10186000  | 0.69667500  | 1.80172200 | C | -2.40782900 | -3.39307700 | -1.80172200 |
| C  | -0.69667500 | -4.10186000 | 1.80172200 | C | -3.39307700 | -2.40782900 | -1.80172200 |
| C  | -4.10186000 | 0.69667500  | 1.80172200 | C | 3.39307700  | -2.40782900 | -1.80172200 |
| C  | -4.10186000 | -0.69667500 | 1.80172200 | C | 2.40782900  | -3.39307700 | -1.80172200 |
| C  | 1.42064500  | 5.25015000  | 2.08667300 | C | 2.40782900  | 3.39307700  | -1.80172200 |
| C  | -1.42064500 | 5.25015000  | 2.08667300 | C | 3.39307700  | 2.40782900  | -1.80172200 |
| C  | 0.70019100  | 6.40911500  | 2.35475000 | C | -4.71696500 | 2.70786900  | -2.08667300 |
| C  | -0.70019100 | 6.40911500  | 2.35475000 | C | -2.70786900 | 4.71696500  | -2.08667300 |
| C  | 5.25015000  | -1.42064500 | 2.08667300 | C | -5.02703800 | 4.03681900  | -2.35475000 |
| C  | 5.25015000  | 1.42064500  | 2.08667300 | C | -4.03681900 | 5.02703800  | -2.35475000 |
| C  | 6.40911500  | -0.70019100 | 2.35475000 | C | -2.70786900 | -4.71696500 | -2.08667300 |
| C  | 6.40911500  | 0.70019100  | 2.35475000 | C | -4.71696500 | -2.70786900 | -2.08667300 |
| C  | -1.42064500 | -5.25015000 | 2.08667300 | C | -4.03681900 | -5.02703800 | -2.35475000 |
| C  | 1.42064500  | -5.25015000 | 2.08667300 | C | -5.02703800 | -4.03681900 | -2.35475000 |
| C  | -0.70019100 | -6.40911500 | 2.35475000 | C | 4.71696500  | -2.70786900 | -2.08667300 |
| C  | 0.70019100  | -6.40911500 | 2.35475000 | C | 2.70786900  | -4.71696500 | -2.08667300 |
| C  | -5.25015000 | 1.42064500  | 2.08667300 | C | 5.02703800  | -4.03681900 | -2.35475000 |
| C  | -5.25015000 | -1.42064500 | 2.08667300 | C | 4.03681900  | -5.02703800 | -2.35475000 |
| C  | -6.40911500 | 0.70019100  | 2.35475000 | C | 2.70786900  | 4.71696500  | -2.08667300 |
| C  | -6.40911500 | -0.70019100 | 2.35475000 | C | 4.71696500  | 2.70786900  | -2.08667300 |
| H  | 2.50522400  | 5.23591800  | 2.09393400 | C | 4.03681900  | 5.02703800  | -2.35475000 |
| H  | -2.50522400 | 5.23591800  | 2.09393400 | C | 5.02703800  | 4.03681900  | -2.35475000 |
| H  | 1.22965500  | 7.33177400  | 2.57277400 | H | -5.47381400 | 1.93089300  | -2.09393400 |
| H  | -1.22965500 | 7.33177400  | 2.57277400 | H | -1.93089300 | 5.47381400  | -2.09393400 |
| H  | 5.23591800  | -2.50522400 | 2.09393400 | H | -6.05384500 | 4.31485000  | -2.57277400 |
| H  | 5.23591800  | 2.50522400  | 2.09393400 | H | -4.31485000 | 6.05384500  | -2.57277400 |
| H  | 7.33177400  | -1.22965500 | 2.57277400 | H | -1.93089300 | -5.47381400 | -2.09393400 |
| H  | 7.33177400  | 1.22965500  | 2.57277400 | H | -5.47381400 | -1.93089300 | -2.09393400 |
| H  | -2.50522400 | -5.23591800 | 2.09393400 | H | -4.31485000 | -6.05384500 | -2.57277400 |
| H  | 2.50522400  | -5.23591800 | 2.09393400 | H | -6.05384500 | -4.31485000 | -2.57277400 |
| H  | -1.22965500 | -7.33177400 | 2.57277400 | H | 5.47381400  | -1.93089300 | -2.09393400 |
| H  | 1.22965500  | -7.33177400 | 2.57277400 | H | 1.93089300  | -5.47381400 | -2.09393400 |
| H  | -5.23591800 | 2.50522400  | 2.09393400 | H | 6.05384500  | -4.31485000 | -2.57277400 |
| H  | -5.23591800 | -2.50522400 | 2.09393400 | H | 4.31485000  | -6.05384500 | -2.57277400 |
|    |             |             |            | H | 1.93089300  | 5.47381400  | -2.09393400 |
|    |             |             |            | H | 5.47381400  | 1.93089300  | -2.09393400 |
|    |             |             |            | H | 4.31485000  | 6.05384500  | -2.57277400 |
|    |             |             |            | H | 6.05384500  | 4.31485000  | -2.57277400 |

**Sc(Pc)<sub>2</sub><sup>+</sup> D<sub>2</sub> symmetry**

|    |             |             |            |   |             |             |             |
|----|-------------|-------------|------------|---|-------------|-------------|-------------|
| Sc | 0.00000000  | 0.00000000  | 0.00000000 | H | -6.30473300 | 3.95852700  | 2.49113500  |
| N  | 0.74832300  | 1.79808600  | 1.25242900 | H | -7.24873500 | 1.69129900  | 2.49859100  |
| N  | -0.74832300 | -1.79808600 | 1.25242900 | N | -0.74832300 | 1.79808600  | -1.25242900 |
| N  | 1.79809800  | -0.74827500 | 1.25243100 | N | 0.74832300  | -1.79808600 | -1.25242900 |
| N  | -1.79809800 | 0.74827500  | 1.25243100 | N | -1.79809800 | -0.74827500 | -1.25243100 |
| N  | 3.08761900  | 1.27236900  | 1.52565200 | N | 1.79809800  | 0.74827500  | -1.25243100 |
| N  | -3.08761900 | -1.27236900 | 1.52565200 | N | -3.08761900 | 1.27236900  | -1.52565200 |
| N  | 1.27245300  | -3.08762100 | 1.52501600 | N | 3.08761900  | -1.27236900 | -1.52565200 |
| N  | -1.27245300 | 3.08762100  | 1.52501600 | N | -1.27245300 | -3.08762100 | -1.52501600 |
| C  | 2.06057800  | 2.09880400  | 1.46915000 | N | 1.27245300  | 3.08762100  | -1.52501600 |
| C  | 0.03800500  | 2.94098100  | 1.47033200 | C | -2.06057800 | 2.09880400  | -1.46915000 |
| C  | 2.09893900  | -2.06064400 | 1.46825400 | C | -0.03800500 | 2.94098100  | -1.47033200 |
| C  | 2.94107300  | -0.03804900 | 1.47017900 | C | -2.09893900 | -2.06064400 | -1.46825400 |
| C  | -2.06057800 | -2.09880400 | 1.46915000 | C | -2.94107300 | -0.03804900 | -1.47017900 |
| C  | -0.03800500 | -2.94098100 | 1.47033200 | C | 2.06057800  | -2.09880400 | -1.46915000 |
| C  | -2.09893900 | 2.06064400  | 1.46825400 | C | 0.03800500  | -2.94098100 | -1.47033200 |
| C  | -2.94107300 | 0.03804900  | 1.47017900 | C | 2.09893900  | 2.06064400  | -1.46825400 |
| C  | 2.22159600  | 3.52393500  | 1.75493000 | C | 2.94107300  | 0.03804900  | -1.47017900 |
| C  | 0.93612900  | 4.05907800  | 1.75735800 | C | -2.22159600 | 3.52393500  | -1.75493000 |
| C  | 3.52425100  | -2.22178700 | 1.75311300 | C | -0.93612900 | 4.05907800  | -1.75735800 |
| C  | 4.05937500  | -0.93630000 | 1.75590400 | C | -3.52425100 | -2.22178700 | -1.75311300 |
| C  | -2.22159600 | -3.52393500 | 1.75493000 | C | -4.05937500 | -0.93630000 | -1.75590400 |
| C  | -0.93612900 | -4.05907800 | 1.75735800 | C | 2.22159600  | -3.52393500 | -1.75493000 |
| C  | -3.52425100 | 2.22178700  | 1.75311300 | C | 0.93612900  | -4.05907800 | -1.75735800 |
| C  | -4.05937500 | 0.93630000  | 1.75590400 | C | 3.52425100  | 2.22178700  | -1.75311300 |
| C  | 3.33307900  | 4.30303100  | 2.02641900 | C | 4.05937500  | 0.93630000  | -1.75590400 |
| C  | 0.70822200  | 5.39654800  | 2.03291800 | C | -3.33307900 | 4.30303100  | -2.02641900 |
| C  | 3.11388300  | 5.65515500  | 2.28486200 | C | -0.70822200 | 5.39654800  | -2.03291800 |
| C  | 1.82390600  | 6.19228600  | 2.28862700 | C | -3.11388300 | 5.65515500  | -2.28486200 |
| C  | 4.30352400  | -3.33337700 | 2.02362000 | C | -1.82390600 | 6.19228600  | -2.28862700 |
| C  | 5.39700700  | -0.70851100 | 2.03079000 | C | 4.30352400  | -3.33337700 | -2.02362000 |
| C  | 5.65580500  | -3.11429200 | 2.28135100 | C | 5.39700700  | -0.70851100 | -2.03079000 |
| C  | 6.19292300  | -1.82431200 | 2.28544100 | C | 5.65580500  | -3.11429200 | -2.28135100 |
| C  | -3.33307900 | -4.30303100 | 2.02641900 | C | 6.19292300  | -1.82431200 | -2.28544100 |
| C  | -0.70822200 | -5.39654800 | 2.03291800 | H | -4.32901300 | 3.87413500  | -2.03559200 |
| C  | -3.11388300 | -5.65515500 | 2.28486200 | H | 0.29742100  | 5.80211700  | -2.04764200 |
| C  | -1.82390600 | -6.19228600 | 2.28862700 | H | -3.95802000 | 6.30394600  | -2.49545900 |
| C  | -4.30352400 | 3.33337700  | 2.02362000 | H | -1.69080400 | 7.24797100  | -2.50234500 |
| C  | -5.39700700 | 0.70851100  | 2.03079000 | H | -3.87464700 | -4.32932100 | -2.03256300 |
| C  | -5.65580500 | 3.11429200  | 2.28135100 | H | -5.80256200 | 0.29713500  | -2.04579300 |
| C  | -6.19292300 | 1.82431200  | 2.28544100 | H | -6.30473300 | -3.95852700 | -2.49113500 |
| H  | 4.32901300  | 3.87413500  | 2.03559200 | H | -7.24873500 | -1.69129900 | -2.49859100 |
| H  | -0.29742100 | 5.80211700  | 2.04764200 | H | 4.32901300  | -3.87413500 | -2.03559200 |
| H  | 3.95802000  | 6.30394600  | 2.49545900 | H | -0.29742100 | -5.80211700 | -2.04764200 |
| H  | 1.69080400  | 7.24797100  | 2.50234500 | H | 3.95802000  | -6.30394600 | -2.49545900 |
| H  | 3.87464700  | -4.32932100 | 2.03256300 | H | 1.69080400  | -7.24797100 | -2.50234500 |
| H  | 5.80256200  | 0.29713500  | 2.04579300 | H | 3.87464700  | 4.32932100  | -2.03256300 |
| H  | 6.30473300  | -3.95852700 | 2.49113500 | H | 5.80256200  | -0.29713500 | -2.04579300 |
| H  | 7.24873500  | -1.69129900 | 2.49859100 | H | 6.30473300  | 3.95852700  | -2.49113500 |
| H  | -4.32901300 | -3.87413500 | 2.03559200 | H | -3.87464700 | 4.32932100  | -2.03256300 |
| H  | 0.29742100  | -5.80211700 | 2.04764200 | H | 5.80256200  | -0.29713500 | -2.04579300 |
| H  | -3.95802000 | -6.30394600 | 2.49545900 | H | 7.24873500  | 1.69129900  | -2.49859100 |
| H  | -1.69080400 | -7.24797100 | 2.50234500 |   |             |             |             |
| H  | -3.87464700 | 4.32932100  | 2.03256300 |   |             |             |             |
| H  | -5.80256200 | -0.29713500 | 2.04579300 |   |             |             |             |

**Sc(Pc)<sub>2</sub><sup>+</sup> D<sub>4d</sub> symmetry**

|    |             |             |            |   |             |             |             |
|----|-------------|-------------|------------|---|-------------|-------------|-------------|
| Sc | 0.00000000  | 0.00000000  | 0.00000000 | H | -7.33666100 | 1.22784700  | 2.51770300  |
| N  | 0.00000000  | 1.94746400  | 1.25246000 | H | -7.33666100 | -1.22784700 | 2.51770300  |
| N  | 0.00000000  | -1.94746400 | 1.25246000 | N | -1.37706500 | 1.37706500  | -1.25246000 |
| N  | 1.94746400  | 0.00000000  | 1.25246000 | N | 1.37706500  | -1.37706500 | -1.25246000 |
| N  | -1.94746400 | 0.00000000  | 1.25246000 | N | -1.37706500 | -1.37706500 | -1.25246000 |
| N  | 2.36148200  | 2.36148200  | 1.52565000 | N | 1.37706500  | 1.37706500  | -1.25246000 |
| N  | -2.36148200 | -2.36148200 | 1.52565000 | N | -3.33964000 | 0.00000000  | -1.52565000 |
| N  | 2.36148200  | -2.36148200 | 1.52565000 | N | 3.33964000  | 0.00000000  | -1.52565000 |
| N  | -2.36148200 | 2.36148200  | 1.52565000 | N | 0.00000000  | -3.33964000 | -1.52565000 |
| C  | 1.09542700  | 2.72950800  | 1.47025000 | N | 0.00000000  | 3.33964000  | -1.52565000 |
| C  | -1.09542700 | 2.72950800  | 1.47025000 | C | -2.70463700 | 1.15547000  | -1.47025000 |
| C  | 2.72950800  | -1.09542700 | 1.47025000 | C | -1.15547000 | 2.70463700  | -1.47025000 |
| C  | 2.72950800  | 1.09542700  | 1.47025000 | C | -1.15547000 | -2.70463700 | -1.47025000 |
| C  | -1.09542700 | -2.72950800 | 1.47025000 | C | -2.70463700 | -1.15547000 | -1.47025000 |
| C  | 1.09542700  | -2.72950800 | 1.47025000 | C | 2.70463700  | -1.15547000 | -1.47025000 |
| C  | -2.72950800 | 1.09542700  | 1.47025000 | C | 1.15547000  | -2.70463700 | -1.47025000 |
| C  | -2.72950800 | -1.09542700 | 1.47025000 | C | 1.15547000  | 2.70463700  | -1.47025000 |
| C  | 0.69616200  | 4.10642200  | 1.75884100 | C | 2.70463700  | 1.15547000  | -1.47025000 |
| C  | -0.69616200 | 4.10642200  | 1.75884100 | C | -3.39593900 | 2.41141800  | -1.75884100 |
| C  | 4.10642200  | -0.69616200 | 1.75884100 | C | -2.41141800 | 3.39593900  | -1.75884100 |
| C  | 4.10642200  | 0.69616200  | 1.75884100 | C | -2.41141800 | -3.39593900 | -1.75884100 |
| C  | -0.69616200 | -4.10642200 | 1.75884100 | C | -3.39593900 | -2.41141800 | -1.75884100 |
| C  | 0.69616200  | -4.10642200 | 1.75884100 | C | 3.39593900  | -2.41141800 | -1.75884100 |
| C  | -4.10642200 | 0.69616200  | 1.75884100 | C | 2.41141800  | -3.39593900 | -1.75884100 |
| C  | -4.10642200 | -0.69616200 | 1.75884100 | C | 2.41141800  | 3.39593900  | -1.75884100 |
| C  | 1.42183200  | 5.25184900  | 2.03800100 | C | 3.39593900  | 2.41141800  | -1.75884100 |
| C  | -1.42183200 | 5.25184900  | 2.03800100 | C | -4.71900500 | 2.70823100  | -2.03800100 |
| C  | 0.69869400  | 6.41424600  | 2.30084600 | C | -2.70823100 | 4.71900500  | -2.03800100 |
| C  | -0.69869400 | 6.41424600  | 2.30084600 | C | -5.02960800 | 4.04150500  | -2.30084600 |
| C  | 5.25184900  | -1.42183200 | 2.03800100 | C | -4.04150500 | 5.02960800  | -2.30084600 |
| C  | 5.25184900  | 1.42183200  | 2.03800100 | C | -2.70823100 | -4.71900500 | -2.03800100 |
| C  | 6.41424600  | -0.69869400 | 2.30084600 | C | -4.71900500 | -2.70823100 | -2.03800100 |
| C  | 6.41424600  | 0.69869400  | 2.30084600 | C | -4.04150500 | -5.02960800 | -2.30084600 |
| C  | -1.42183200 | -5.25184900 | 2.03800100 | C | -5.02960800 | -4.04150500 | -2.30084600 |
| C  | 1.42183200  | -5.25184900 | 2.03800100 | C | 4.71900500  | -2.70823100 | -2.03800100 |
| C  | -0.69869400 | -6.41424600 | 2.30084600 | C | 2.70823100  | -4.71900500 | -2.03800100 |
| C  | 0.69869400  | -6.41424600 | 2.30084600 | C | 5.02960800  | -4.04150500 | -2.30084600 |
| C  | -5.25184900 | 1.42183200  | 2.03800100 | C | 4.04150500  | -5.02960800 | -2.30084600 |
| C  | -5.25184900 | -1.42183200 | 2.03800100 | C | 2.70823100  | 4.71900500  | -2.03800100 |
| C  | -6.41424600 | 0.69869400  | 2.30084600 | C | 4.71900500  | 2.70823100  | -2.03800100 |
| C  | -6.41424600 | -0.69869400 | 2.30084600 | C | 4.04150500  | 5.02960800  | -2.30084600 |
| H  | 2.50609100  | 5.23906000  | 2.05059200 | C | 5.02960800  | 4.04150500  | -2.30084600 |
| H  | -2.50609100 | 5.23906000  | 2.05059200 | H | -5.47664900 | 1.93250100  | -2.05059200 |
| H  | 1.22784700  | 7.33666100  | 2.51770300 | H | -1.93250100 | 5.47664900  | -2.05059200 |
| H  | -1.22784700 | 7.33666100  | 2.51770300 | H | -6.05602200 | 4.31958400  | -2.51770300 |
| H  | 5.23906000  | -2.50609100 | 2.05059200 | H | -4.31958400 | 6.05602200  | -2.51770300 |
| H  | 5.23906000  | 2.50609100  | 2.05059200 | H | -1.93250100 | -5.47664900 | -2.05059200 |
| H  | 7.33666100  | -1.22784700 | 2.51770300 | H | -5.47664900 | -1.93250100 | -2.05059200 |
| H  | 7.33666100  | 1.22784700  | 2.51770300 | H | -4.31958400 | -6.05602200 | -2.51770300 |
| H  | -2.50609100 | -5.23906000 | 2.05059200 | H | -6.05602200 | -4.31958400 | -2.51770300 |
| H  | 2.50609100  | -5.23906000 | 2.05059200 | H | 5.47664900  | -1.93250100 | -2.05059200 |
| H  | -1.22784700 | -7.33666100 | 2.51770300 | H | 1.93250100  | -5.47664900 | -2.05059200 |
| H  | 1.22784700  | -7.33666100 | 2.51770300 | H | 6.05602200  | -4.31958400 | -2.51770300 |
| H  | -5.23906000 | 2.50609100  | 2.05059200 | H | 4.31958400  | -6.05602200 | -2.51770300 |
| H  | -5.23906000 | -2.50609100 | 2.05059200 | H | 1.93250100  | 5.47664900  | -2.05059200 |
|    |             |             |            | H | 5.47664900  | 1.93250100  | -2.05059200 |
|    |             |             |            | H | 4.31958400  | 6.05602200  | -2.51770300 |
|    |             |             |            | H | 6.05602200  | 4.31958400  | -2.51770300 |
